# Supplementary material for: Footprints of climate in groundwater and precipitation
Source: Copernicus journal article supplement (doi:10.5194/hess-11-785-2007), 2007-01-26
Supplement: Supplementary file 1 [file hess-11-785-2007-supplement.pdf]

# Footprints of Climate in Groundwater and Precipitation

A. Liebminger, G. Haberhauer, W. Papesch & G. Heiss

variability in the  
atmospheric  
circulation

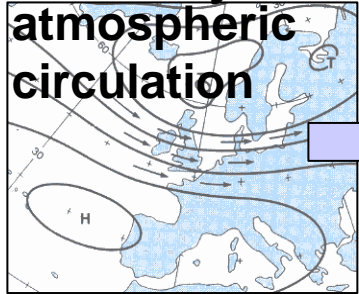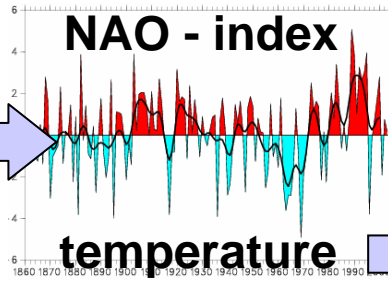

temperature  
moisture

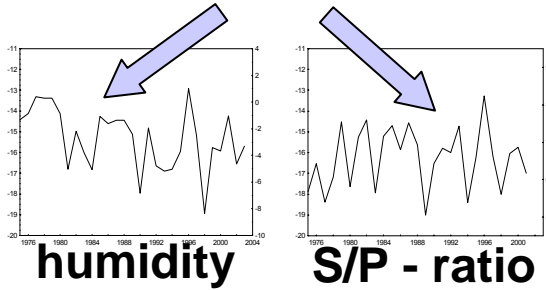

isotopic  
variability

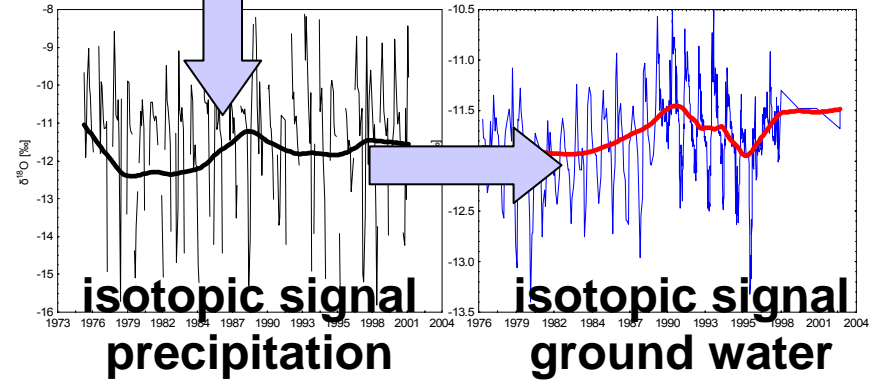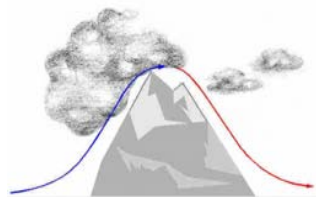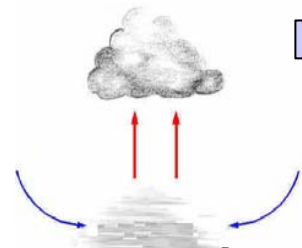

topography

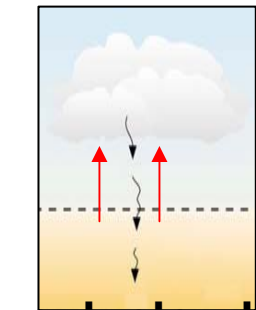

sub cloud  
evaporation

isotopic  
shift

**Sup. Fig. 1.** The variability in the atmospheric circulation leads to the records of the NAO-index representing mainly differences in temperature and moisture. The well known correlation of temperature with the isotopic signal in precipitation is reflected as the main root cause for isotopic variability in the scheme (arrow for isotopic variability). As described in the manuscript there are other impacts although temperature driven also dependent on local geographical parameters (like sub cloud evaporation) which are able to create significant shifts within the isotopic composition in precipitation (arrow for isotopic shift). Finally this isotopic signal is preserved in groundwater of shorter mean residence times.
